# Supplementary material for: Comparison of Effectiveness and Safety between High-Power Short-Duration Ablation and Conventional Ablation for Atrial Fibrillation: A Systematic Review and Meta-Analysis
Source: J Interv Cardiol. 2022 Aug 16;2022:6013474. doi: 10.1155/2022/6013474 (PMC9398879; doi:10.1155/2022/6013474)
Supplement: Supplementary Materials — (1) Supplementary file 1: funnel plots for various outcomes from the primary pooled analysis comparing HPSD RFA with conventional RFA. (2) Supplementary file 2: forest plots for the subgroup analysis of HPSD RFA compared to conventional RFA. (3) PRISMA 2009 Checklist. [file 6013474.f1.zip]

Archive with 3 entries (3 files):
- PRISMA 2009 Checklist.doc
- Supplementary files 1 (1).docx
- supplementary files 2.docx
